# Supplementary material for: E2F1-miR-20a-5p/20b-5p auto-regulatory feedback loop involved in myoblast proliferation and differentiation
Source: PubMed Central journal article supplement (PMC4901305; doi:10.1038/srep27904), 2016-06-10

**E2F1-miR-20a-5p/20b-5p auto-regulatory feedback loop involved in myoblast  
proliferation and differentiation**

Wen Luo<sup>1,2</sup>, Guihuan Li<sup>1,2</sup>, Zhenhua Yi<sup>1,2</sup>, Qinghua Nie<sup>1,2</sup>, Xiquan Zhang<sup>\*1,2</sup>

**Supplementary file 1.** The histograms of cell cycle analyzed by flow cytometry.

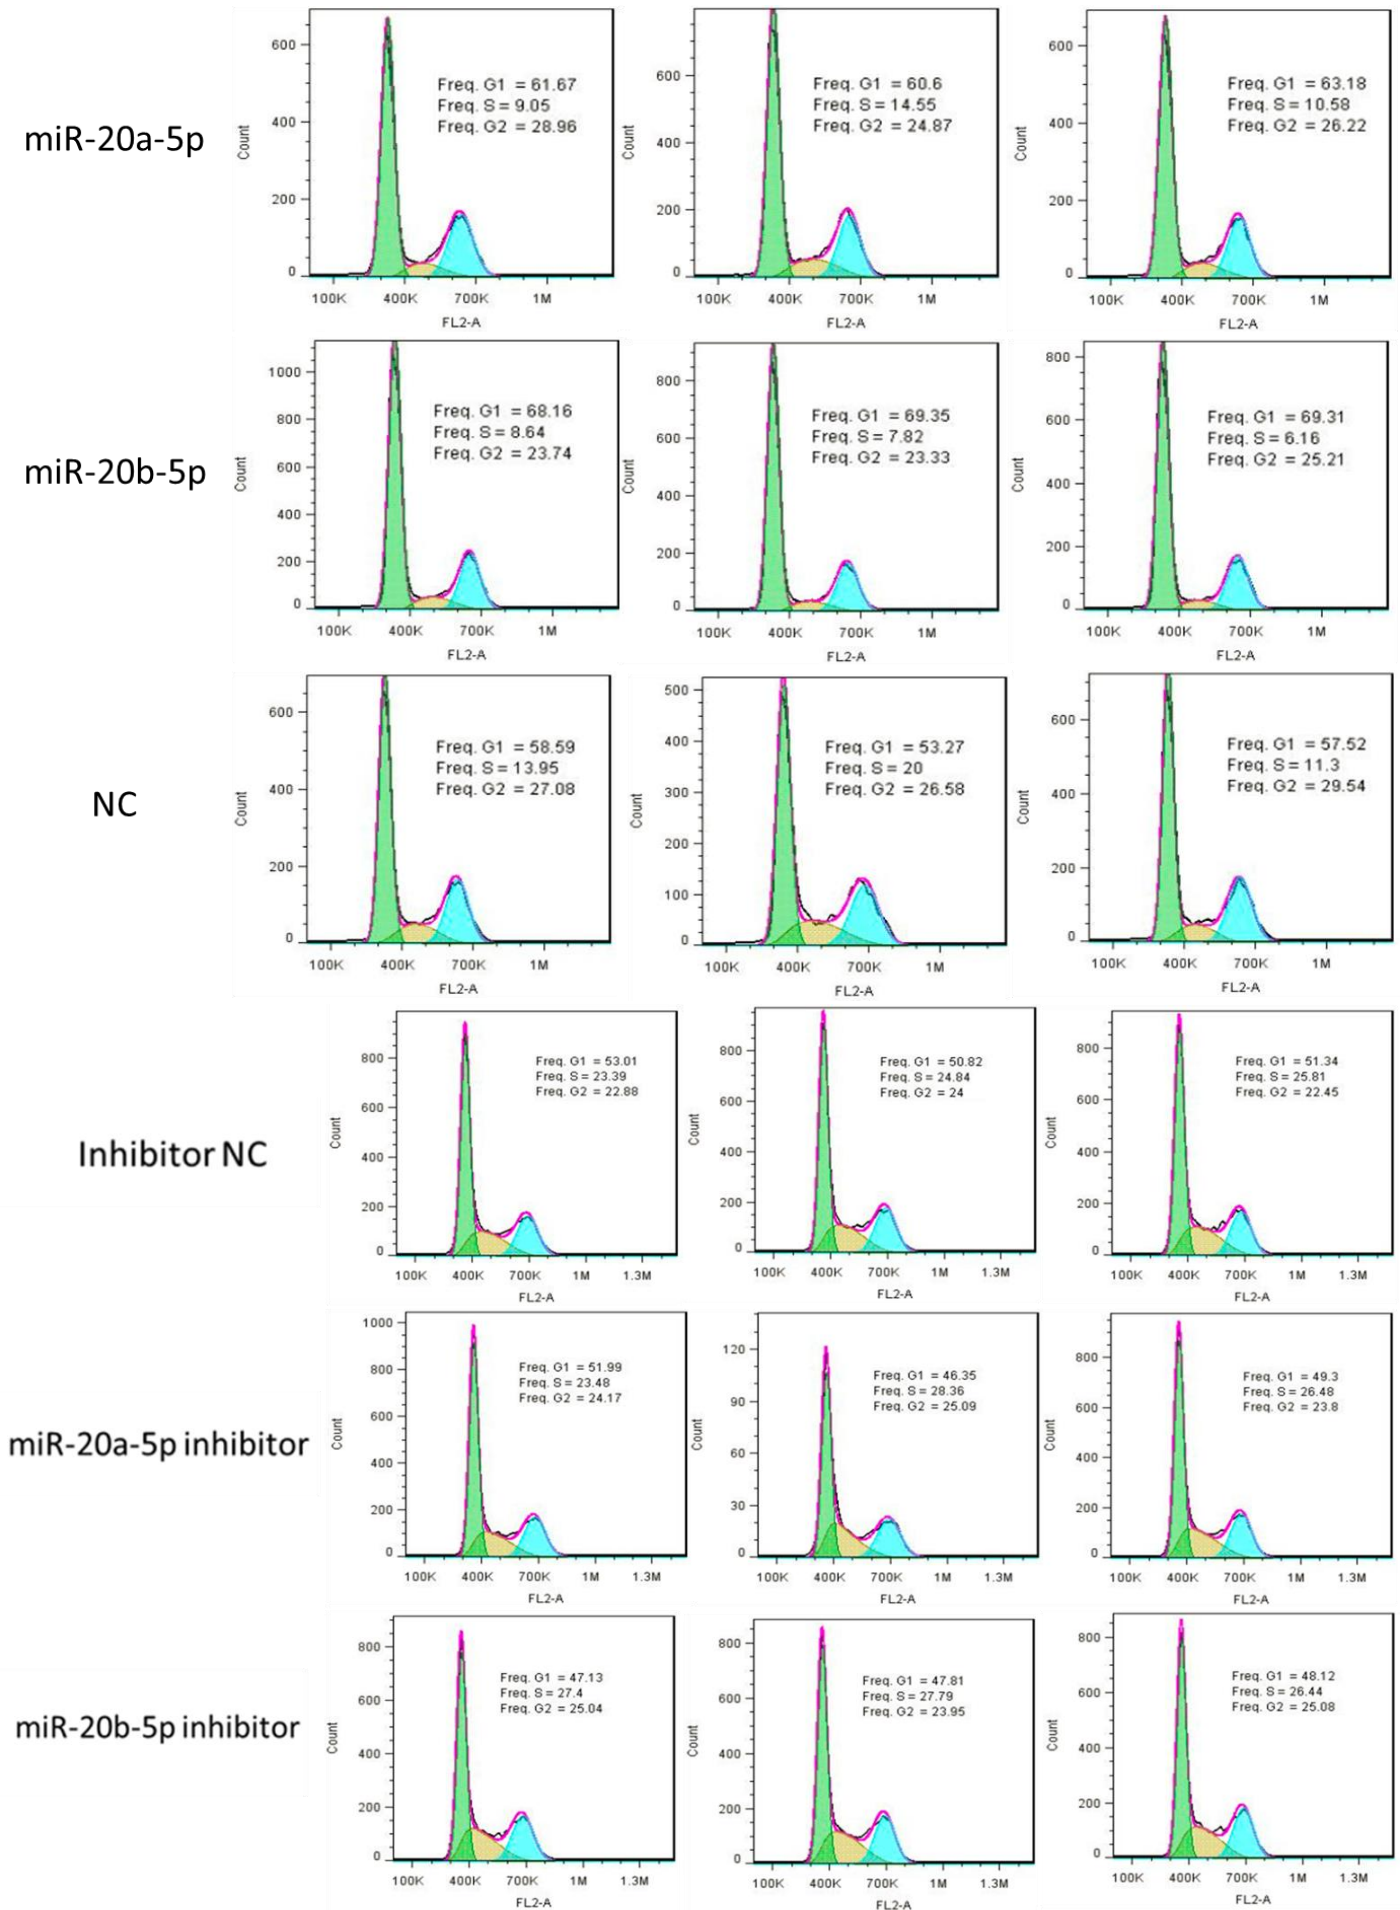

### miR-20a-5p/20b-5p and pcDNA3.1-EGFP

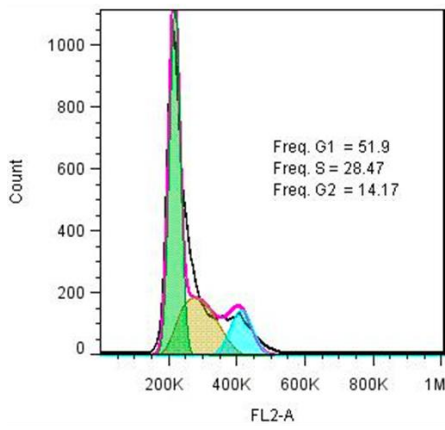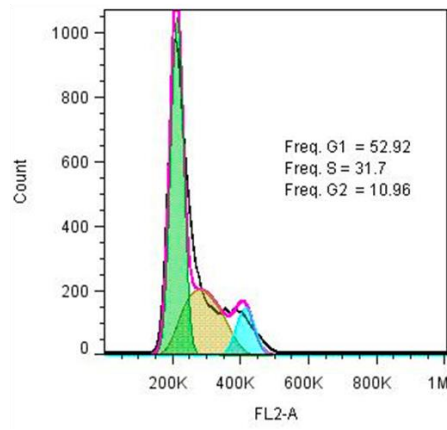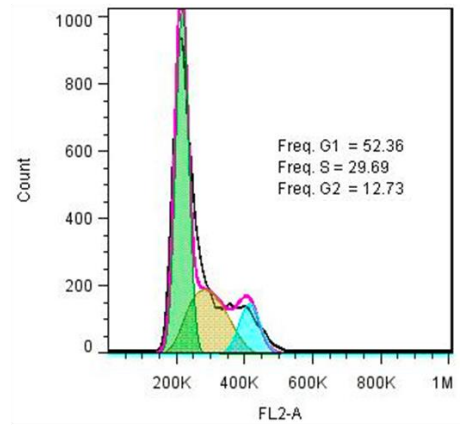

### miR-20a-5p/20b-5p and pcDNA3.1-E2F1

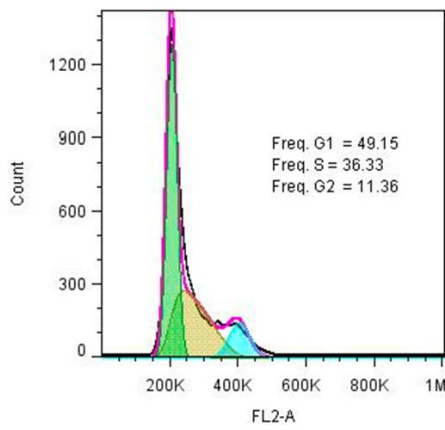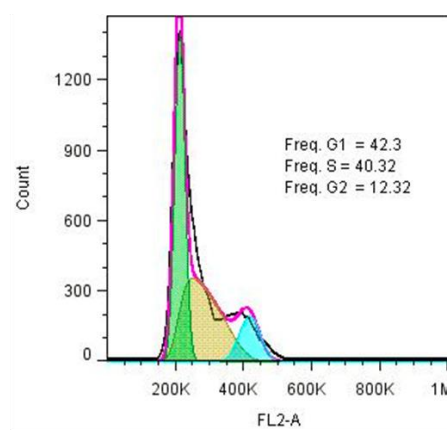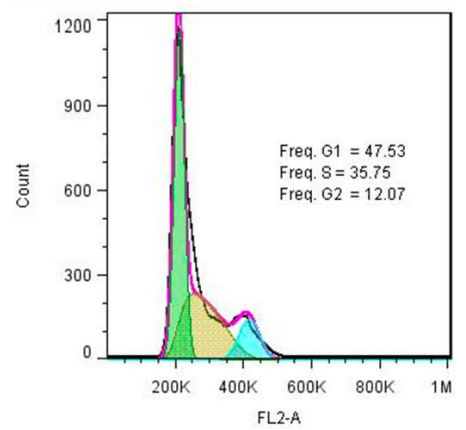

### NC and pcDNA3.1-EGFP

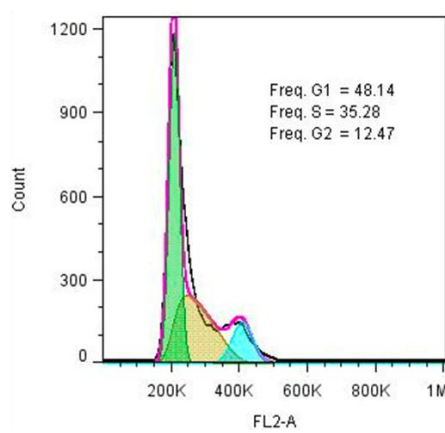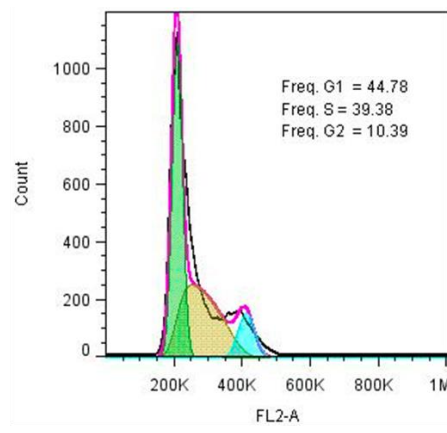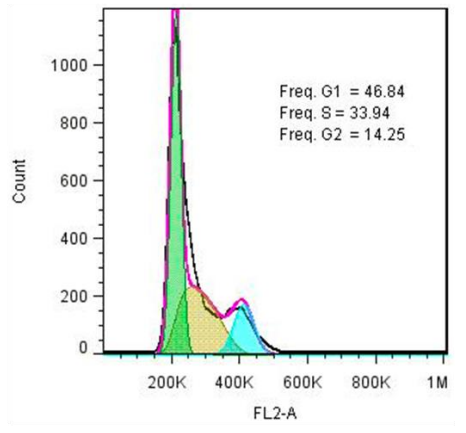

pcDNA3.1-E2F1

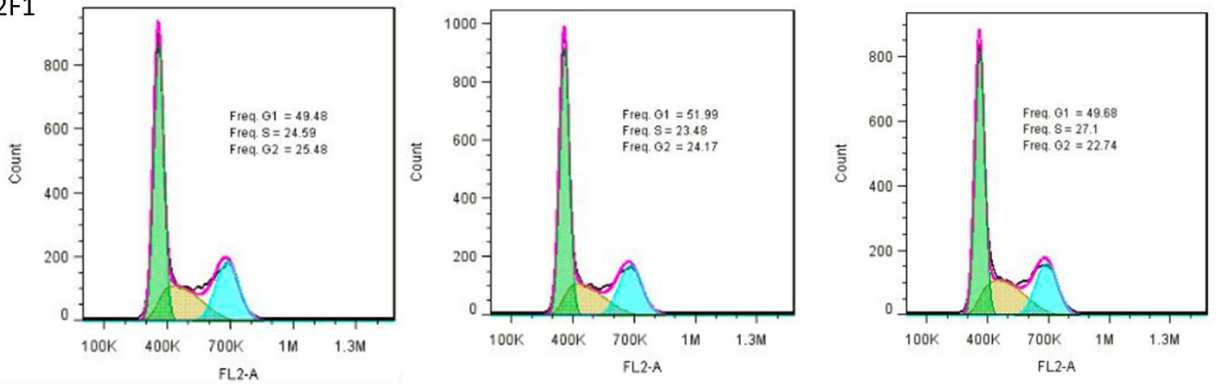

pcDNA3.1-EGFP

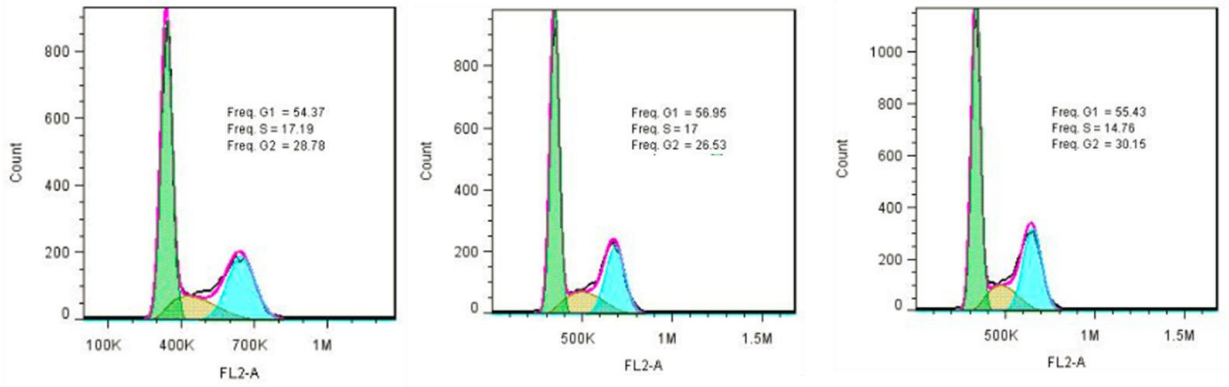

si-E2F1

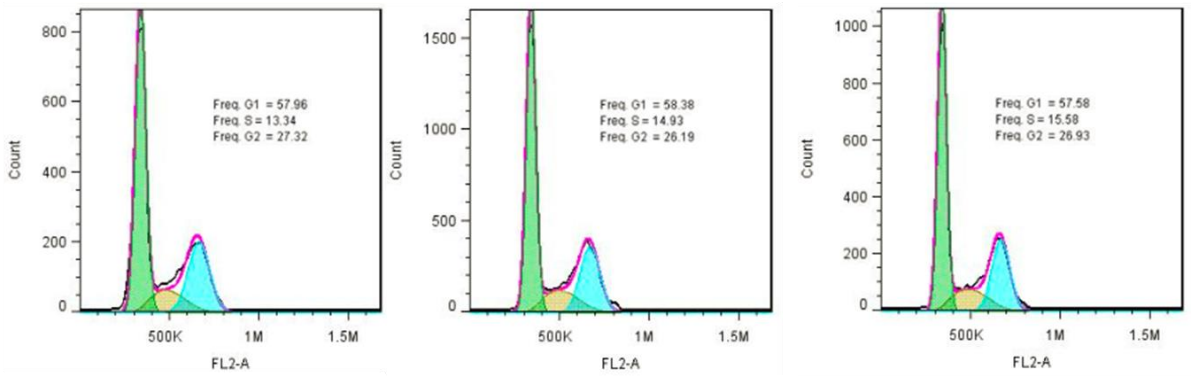

si-NC

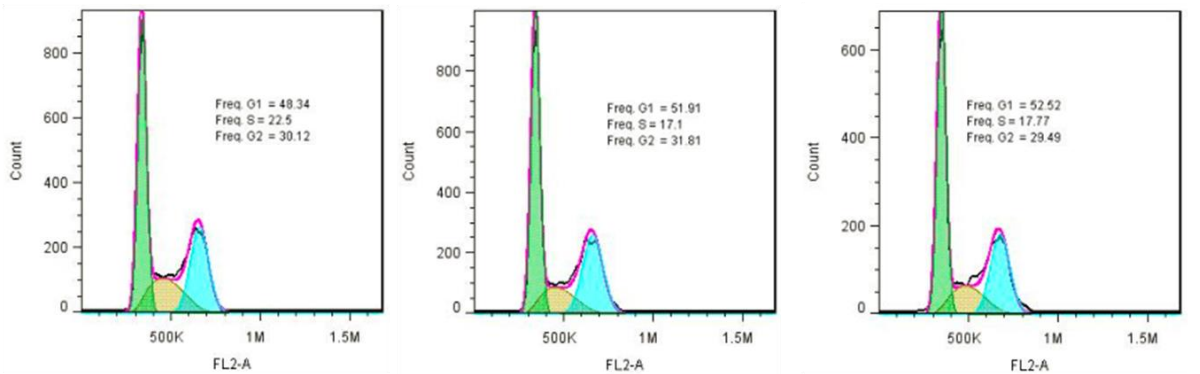

## Supplementary File 2.

Oligonucleotides:

For ChIP-qPCR or PCR analysis the following primers were used:

Amplico A:

s: 5'- GCACTTGTCCGAGCGGGAATC

as: 5'- CAGTCGCAGCTCATGGTGGC

Amplico B:

s: 5' - TACTCGCTTTGGGTTGCTG

as: 5' - CGGACGGCTGCTGGTTT

Amplico C:

s: 5' - AAACAGTTGTATGGGTGA

as: 5' - GACAGGGTCTTATTATGC

Amplico D:

s: 5' - CCGGTCCTGCCATGTTT

as: 5' - ACGCTTCCACTGCTCCTG

Amplico E:

s: 5' - GAGAATGGAAAGATAAACACGG

as: 5' - TTTTGGCTGGTCGGTGC

For cloning the following primers were used for PCR:

E2F1 CDS (reference sequence: NM\_205219.1) cloning for pcDNA3.1:

s: 5'- GGGGTACCCCGTCACCTGAGCCATG

as: 5'- CCGCTCGAGGAGGAGGAAACAAACCCAAAA

Reporter-1 cloning: s: 5'- cggGGTACCGGGAAAGGGAGGTCTCG

as: 5'- tccCCCGGGGGCTGTAAGTTACCCAAGC

Reporter-2 cloning: s: 5'- cggGGTACCAACCACCACAACACGCAATG

as: 5'- ccgCTCGAGATGTTGACCTCTCGCCATCG

Reporter-3 cloning: s: 5'- cGAGCTCTTTGGCTGGTCGGTGCG

as: 5'- tccCCCGGGGCGAAAGAAAAGAAAGAAAGG

Reporter-4 cloning: s: 5'- cggGGTACCAGAAGGGAAGAGTGAGCCG

as: 5'- ccgCTCGAGTCGCAGGAATGCCAAAA

E2F1 3'UTR Fragment (reference sequence: NM\_205219.1):

s: 5'- CCGCTCGAGTGCCTCACTGCCAAGGG

as: 5'- ACGCGTCGACCGAAGCTCAGCGGAACAC

For mutagenesis the following primers were used for PCR:

E2F1-3'UTR-mut:

s: 5'- AGGCCCGGGGCCAGGCTGGAGCCGAGAGCGCACTTACTGCCTTTAACAAGCTTGT

as: 5'- ACAAGCTTGTTAAAGGCAGTAAGTGCCTCTCGGCTCCAGCCTGGCCCCGGGGCCT

For quantitative real time RT-PCR, the following primers were used:

Myomaker-qPCR (reference sequence: KP230536.1): s: 5'- TGGGTGTCCCTGATGGC

as: 5'- CCCGATGGGTCCTGAGTAG

MYOD-qPCR (reference sequence: NM\_204214.2): s: 5'- GCTACTACACGGAATCACCAAAT

as: 5'- CTGGGCTCCACTGTCACTCA

MYOG-qPCR (reference sequence: NM\_204184.1): s: 5'- CGGAGGCTGAAGAAGGTGAA

as: 5'- CCGTCCCTCTGCCTGGTCAT

MyHC-qPCR (reference sequence: ENSGALT00000001427):

s: 5'- CTCCTCACGCTTTGGTAA

as: 5'- TGATAGTCGTATGGGTGGT

E2F1-qPCR (reference sequence: NM\_205219.1): s: 5'- AGACGGATCACCAGTACATAGCC

as: 5'- GTTCAGCGAGGTTTCATAGCG

$\beta$ -actin-qPCR (reference sequence: NM\_205518.1): s: 5'- TTGTTGACAATGGCTCCGGT

as: 5'- AACCATCACACCCTGATGTCT

pri-miR-17~92-qPCR (reference sequence: chicken genome, chr1: 147252628-147254423):

s: 5'- CCTGAGGCAGCTGTCAACAT

as: 5'- AAAGCTGGTTGCGTCAGAGT

pri-miR-106a~363-qPCR (reference sequence: chicken genome, chr4: 3945818-3947210):

s: 5'- TGTGGAGGAAAGGAGGAC

as: 5'- TTGCGGTTTACAGATGGA

### Supplementary File 3.

The used in the main figures of full-gels are shown. All cropped gels have been run under the same experimental condition.

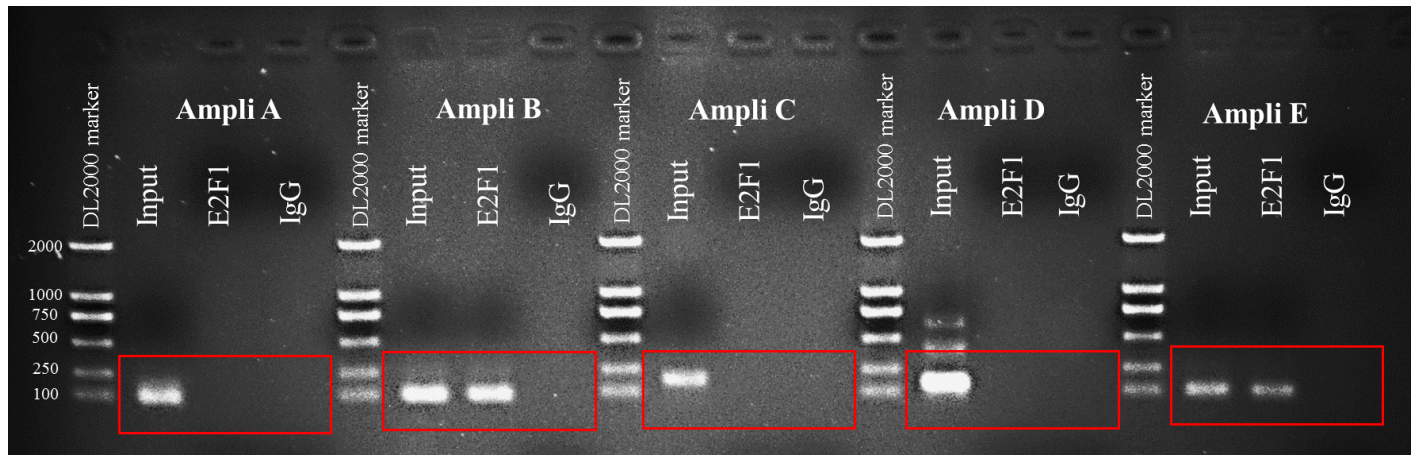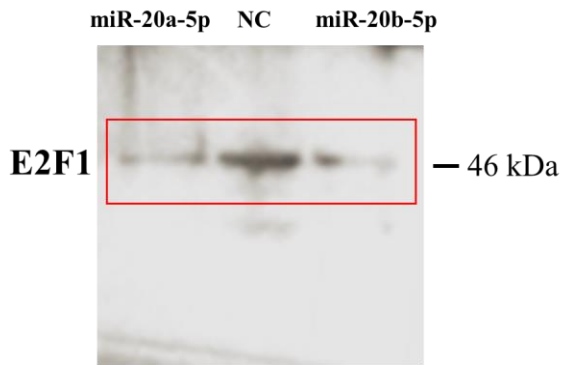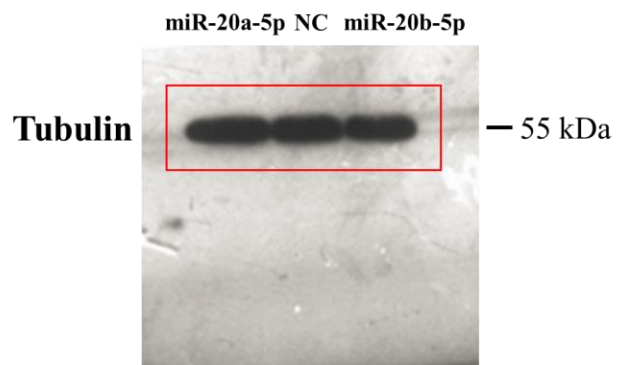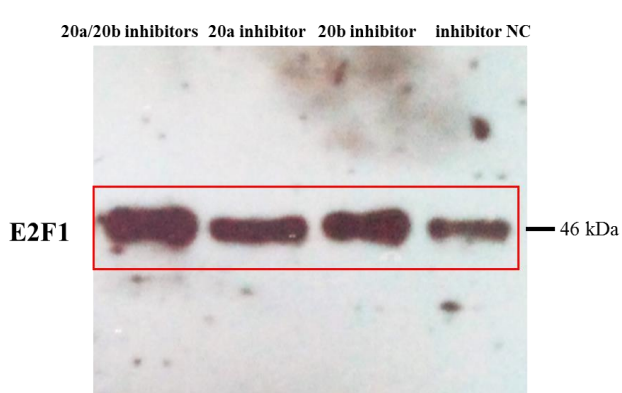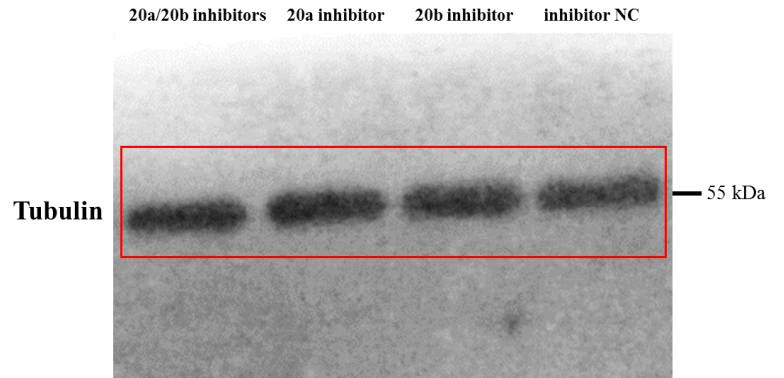

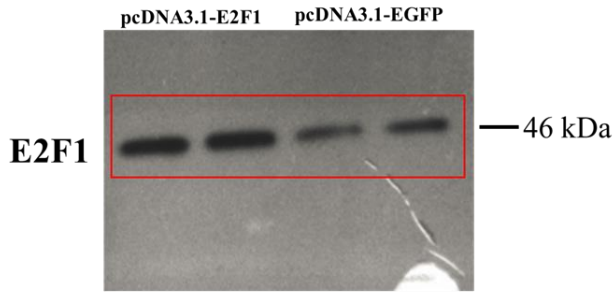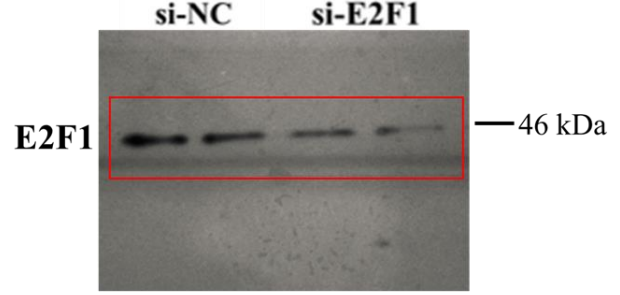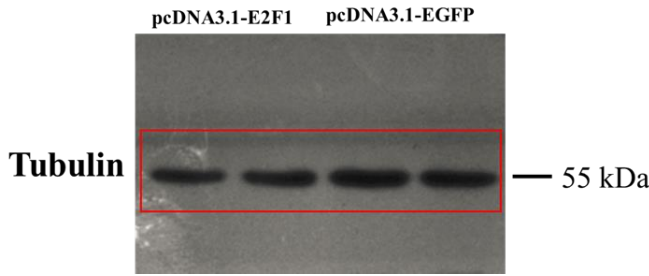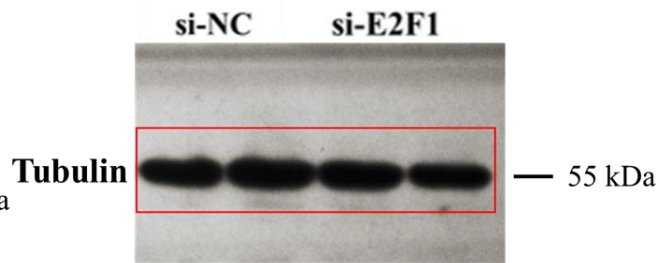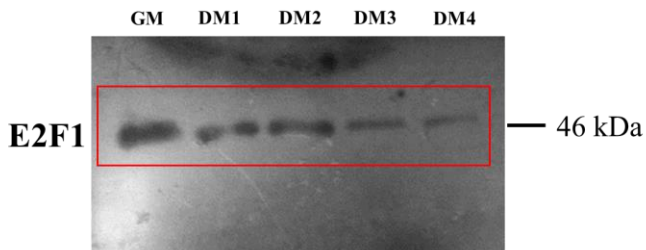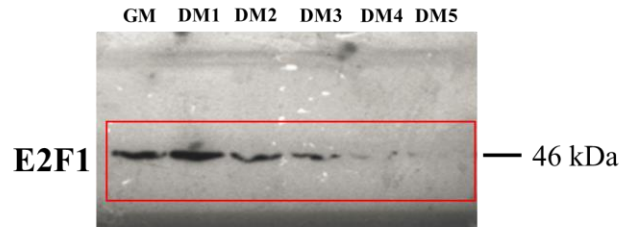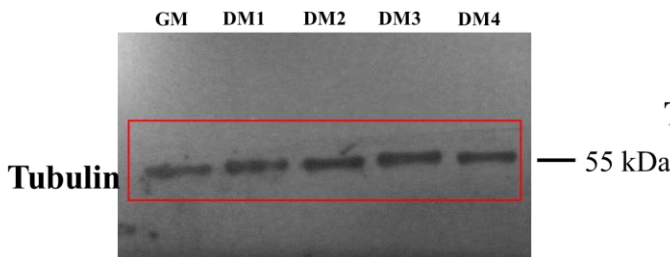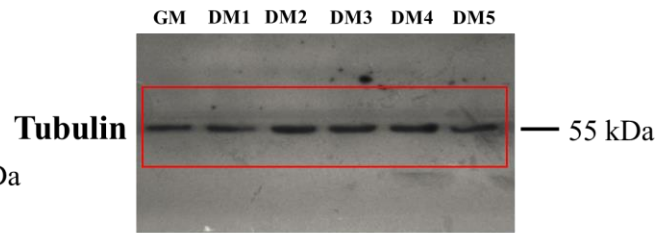

Supplement: srep27904-s1.pdf [file srep27904-s1.pdf]
